# Supplementary material for: Analysis of complete genomes of the rubella virus genotypes 1E and 2B which circulated in China, 2000–2013
Source: PubMed Central journal article supplement (PMC5154293; doi:10.1038/srep39025), 2016-12-13

**Analysis of complete genomes of the rubella virus genotypes  
1E and 2B which circulated in China, 2000-2013**

Zhen Zhu<sup>1\*</sup>, Min-hsin Chen<sup>2\*</sup>, Emily Abernathy<sup>2</sup>, Joseph Icenogle<sup>2</sup>, Shujie Zhou<sup>3</sup>,  
Changyin Wang<sup>4</sup>, Chunfang Zhao<sup>5</sup>, Yan Wang<sup>6</sup>, Haiyun Chen<sup>7</sup>, Yuan Si<sup>8</sup>, and Wenbo  
Xu<sup>1§</sup>

Supplemental Table 1. Primers used for amplification and sequencing of genotype 1E and 2B RVs

| Genotype | Position* | Sequence (5'-3' orientation) | Forward/reverse |
|----------|-----------|------------------------------|-----------------|
| 1E       | 1-22      | CAATGGGAGCTATCGGACCTCG       | Forward         |
|          | 1607-1624 | CTCGGCGAACAGCCACGG           | Reverse         |
|          | 1367-1386 | GAGGAGTGGGAACAGGACGC         | Forward         |
|          | 3149-3168 | GTGTACCGGCAGAGTTCGCA         | Reverse         |
|          | 2993-3013 | GCGGGGCTCGCTGCCAGGCGC        | Forward         |
|          | 4613-4632 | GTGTATGCGCGTATGCCAGC         | Reverse         |
|          | 4346-4365 | GCGGAGGTGATCTGCGTCGG         | Forward         |
|          | 5646-5666 | CGACCTCGATGGCATTGGTGG        | Reverse         |
|          | 5246-5263 | GAGTGGCGCCTGACGTAC           | Forward         |
|          | 6543-6561 | TCGAGGGCCTTCTGGAGGT          | Reverse         |
|          | 6366-6383 | GCGCCAACCTCCACGACG           | Forward         |
|          | 7479-7499 | GGTGGTGATGGCCGTAGTGCT        | Reverse         |
|          | 7217-7236 | GGCACGCGCTGGCACCGACT         | Forward         |
|          | 8426-8445 | CCCAAGCCCTCGCACGAGAC         | Reverse         |
|          | 8251-8271 | CTATGGCGAGGAGGCTTTCAC        | Forward         |
|          | 9737-9762 | CTATACAGCAACAGGTGCGGGAATCT   | Reverse         |
| 2B       | 1-22      | CAATGGGAGCTATCGGACCTCG       | Forward         |
|          | 1607-1624 | CTCGGCGAACAGCCACGG           | Reverse         |
|          | 1364-1383 | ATGGAGGAGTGGGAACAGGA         | Forward         |
|          | 2706-2725 | AGCGACCGCGTGGATGATGT         | Reverse         |
|          | 2587-2604 | CGTCTGCGGTGCCATCTT           | Forward         |
|          | 3808-3827 | CGCGCACTTCGAGCACCACG         | Reverse         |
|          | 2993-3013 | GCGGGGCTCGCTGCCAGGCGC        | Forward         |
|          | 4613-4632 | GTGTATGCGCGTATGCCAGC         | Reverse         |
|          | 4346-4365 | GCGGAGGTGATCTGCGTCGG         | Forward         |
|          | 5646-5666 | CGACCTCGATGGCATTGGTGG        | Reverse         |

---

|           |                            |         |
|-----------|----------------------------|---------|
| 5246-5263 | GAGTGGCGCCTGACGTAC         | Forward |
| 6542-6560 | TCGAGGGCCTTCTGGAGGT        | Reverse |
| 6366-6383 | GCGCCAACCTCCACGACG         | Forward |
| 7478-7498 | GGTGGTGATGGCCGTAGTGCT      | Reverse |
| 7325-7345 | ATCCTTGGCGCATCCGCTTC       | Forward |
| 8389-8408 | CAGATGCAGGCTCCGGTGGC       | Reverse |
| 8250-8270 | CTATGGCGAGGAGGCTTTCAC      | Forward |
| 9736-9761 | CTATACAGCAACAGGTGCGGGAATCT | Reverse |

---

\*Genotype 1E primers were designed based on the 1E sequence 6423\_ITALY\_1997 (GenBank accession number DQ085343); genotype 2B primers were designed based on the 2B sequence Anam5\_Korea\_1996 (GenBank accession number DQ085342).

Supplemental Table 2. 32 selected RV sequences used for phylogenetic analysis

| Virus                          | Abbreviation          | Genotype | Strain                                                        | GenBank<br>Accession<br>number |
|--------------------------------|-----------------------|----------|---------------------------------------------------------------|--------------------------------|
| Rvi/NewJersey.USA/61           | NJ.USA/61             | 1a       | M33; lab strain                                               | JN635281                       |
| RV/Connecticut.USA/0.64        | CT.USA/64             | 1a       | F-therien; lab<br>strain and<br>NCBI<br>reference<br>sequence | NC001545                       |
| RVi/Leipzig.DEU/84             | Ulrike.GER/84         | 1a       | Wild-type                                                     | AF435865                       |
| RVi/Toyama.JPN/0.67            | TO-336/JPN/67         | 1a       | Wild-type                                                     | AB047330                       |
| RVi/Matsue.JPN/68              | Matsue.JPN/68         | 1a       | Vaccine                                                       | AB222609                       |
| RVi/Brooklyn.NY.USA/15.99      | Brooklyn.NY.USA/99    | 1B       | Wild-type                                                     | JN635285                       |
| RVi/Cordoba.ARG/88             | Cordoba.ARG/88        | 1B       | Wild-type                                                     | DQ085339                       |
| RVi/California.USA/91          | California.USA/91     | 1C       | Wild-type                                                     | JN635283                       |
| RVi/Texas.USA/34.98            | Texas.USA/98          | 1C       | Wild-type                                                     | JN635284                       |
| RVi/Mexico/97                  | Anim.Mexico/97        | 1C       | Wild-type                                                     | DQ085341                       |
| RVi/California.USA/88          | CA.USA/88             | 1D       | Wild-type                                                     | JN635285                       |
| RVs/JC2.NZL/91                 | JC2.NZL/91            | 1D       | Wild-type                                                     | DQ388281                       |
| RV/BarHarbor.ME.USA/43.08      | BarHarbor.ME.USA/08   | 1E       | Wild-type                                                     | JN635286                       |
| RVi/Springfield.MA.USA/49.98   | Springfield.MA.USA/98 | 1E       | Wild-type                                                     | JN635287                       |
| RVi/Pullman.WA.USA/30.08       | Pullman.WA.USA/08     | 1E       | Wild-type                                                     | JN635288                       |
| RVi/6423.ITA/1997              | 6423/ITA97            | 1E       | Wild-type                                                     | DQ085343                       |
| RVi/Shandong.CHN/15.00/1       | Shandong.CHN/00       | 1F       | Wild-type                                                     | JQ624625                       |
| RVi/Dangshan.Anhui.CHN/39.00/3 | Dangshan.Anhui.CHN/00 | 1F       | Wild-type                                                     | JQ624624                       |
| RVi/Boston.MA.USA/13.07        | Boston.MA.USA/07      | 1G       | Wild-type                                                     | JN635289                       |
| RVi/Lebanon.NH.USA/3.05        | Lebanon.NH.USA/05     | 1G       | Wild-type                                                     | JN635290                       |
| Stuttgart.DEU/92               | Stuttgart.DEU/92      | 1G       | Wild-type                                                     | DQ388280                       |
| RVi/DalyCity.CA.USA/.97        | DalyCity.CA.USA/97    | 1J       | Wild-type                                                     | JN635291                       |
| RVi/Beijing.CHN/79             | BR1-CHN/79            | 2A       | Wild-type                                                     | AY258322                       |
| RVi/TelAviv.ISR/68             | I-11.ISR/68           | 2B       | Wild-type                                                     | DQ085338                       |
| RVi/Kalamazoo.MI.USA/4.07-1    | Kalamazoo.MI.USA/07   | 2B       | Wild-type                                                     | JN635292                       |
| RVi/Seattle.WA.USA/16.00       | Seattle.WA.USA/00     | 2B       | Wild-type                                                     | JN635293                       |
| RV/LA.CA.USA/45.08CRS          | LA.CA.USA/08          | 2B       | Wild-type                                                     | JN635294                       |
| RVi/Eagan.MN.USA/13.09         | Eagan.MN.USA/09       | 2B       | Wild-type                                                     | JN635295                       |
| RVi/Bismarck.ND.USA/23.08      | Bismarck.ND.USA/08    | 2B       | Wild-type                                                     | JN635296                       |
| RVi/Anam5.KOR/1996             | Anam5.KOR/96          | 2B       | Wild-type                                                     | DQ085342                       |
| RVi/Moscow.RUS/1967            | Moscow.RUS/67         | 2C       | Unknown                                                       | DQ388279                       |
| RVi/C74.RUS/1997               | C74.RUS/97            | 2C       | Unknown                                                       | DQ085340                       |

Supplemental Figure 1. Phylogenetic analysis of 42 Rubella viruses using the sequences of the 739-nt genotyping window using the Maximum Likelihood method based on the Tamura-Nei model (A) or the Neighbor-Joining method (B). The tree is drawn to scale at the bottom of the figure, with branch lengths measured in the number of substitutions per site.

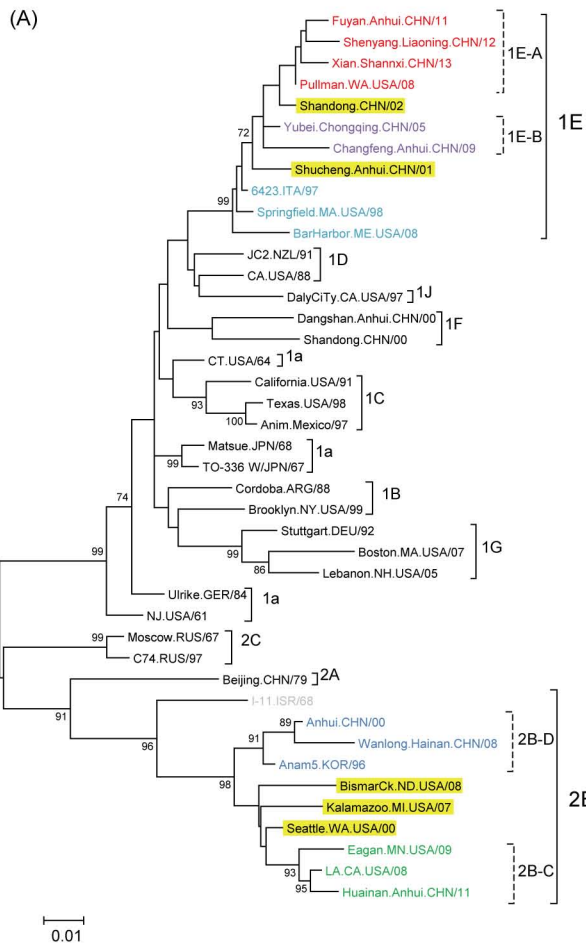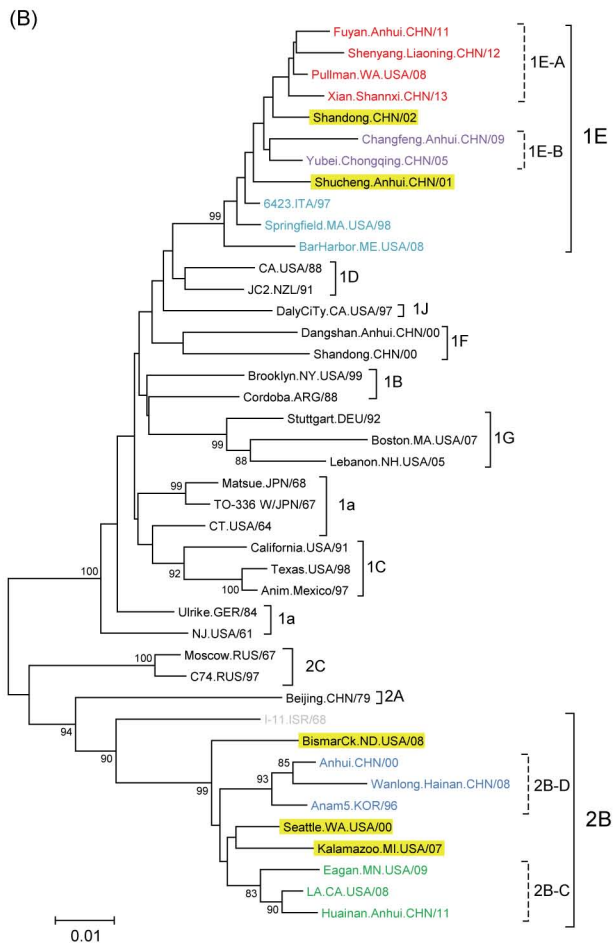

Supplemental Figure 2. The average genetic distance of all 42 rubella viruses in different regions. A. Nucleotide transitions (Ts) and transversions (Tv) at the 1<sup>st</sup>, 2<sup>nd</sup> and 3<sup>rd</sup> codon position; B. The genetic distance of nucleotide (nt) and amino acid (aa).

# A. Variability at coding positions in different domains

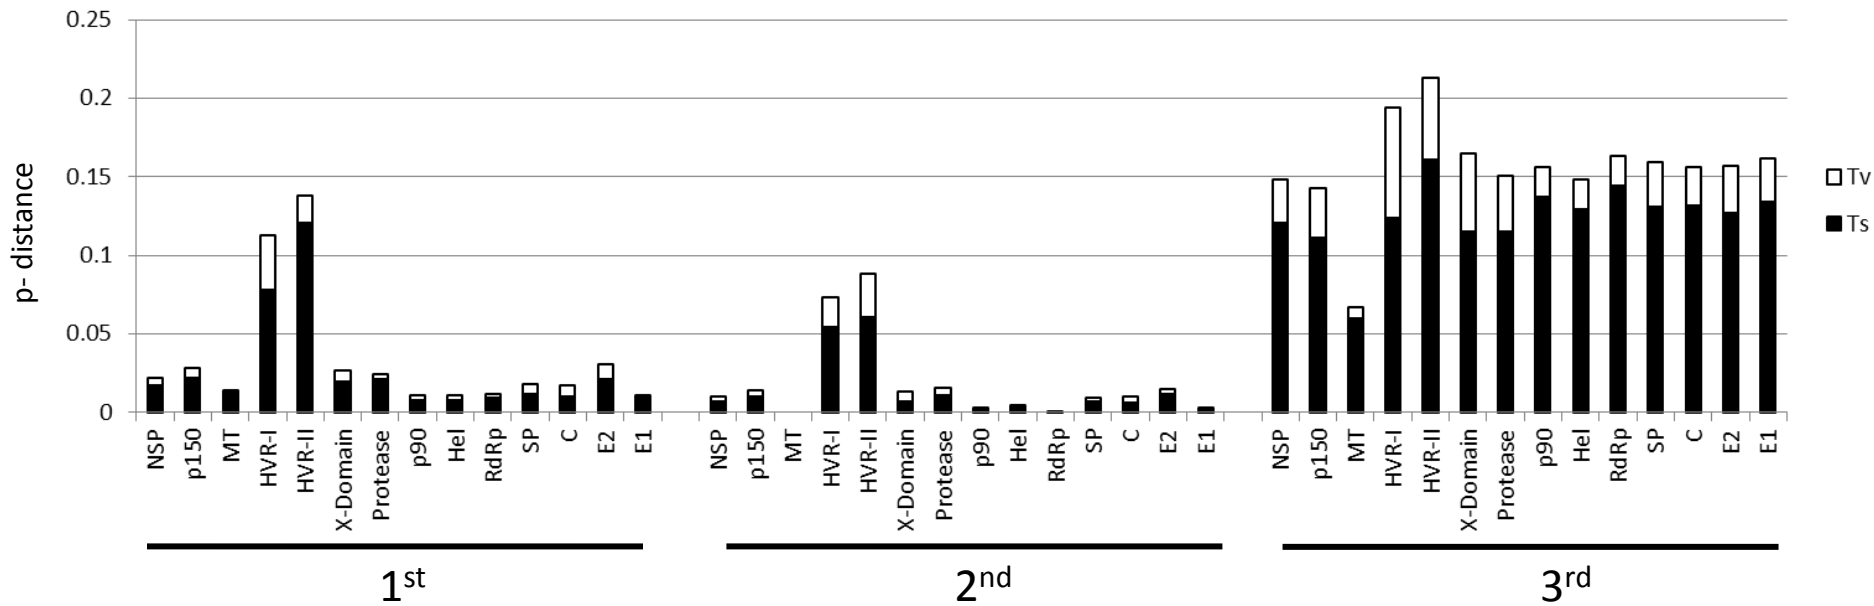

# B. Average genetic distance of all 42 viruses in different domains

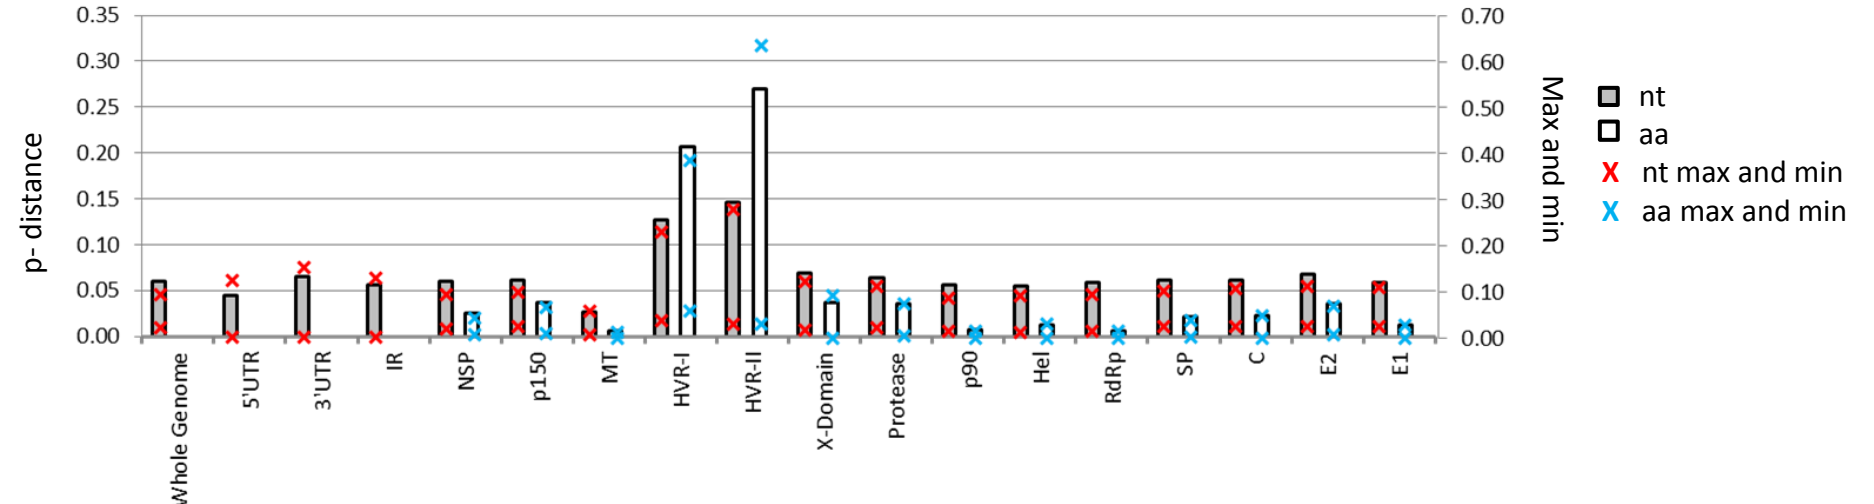



Supplemental Figure 3. The genetic variability within (A) and among (B and C) different clusters of genotype 1E rubella viruses. The methods for estimating genetic divergence within or between clusters pairwise and graphing are as described in Figure 2.

**A. Genetic variability within 1E clusters**

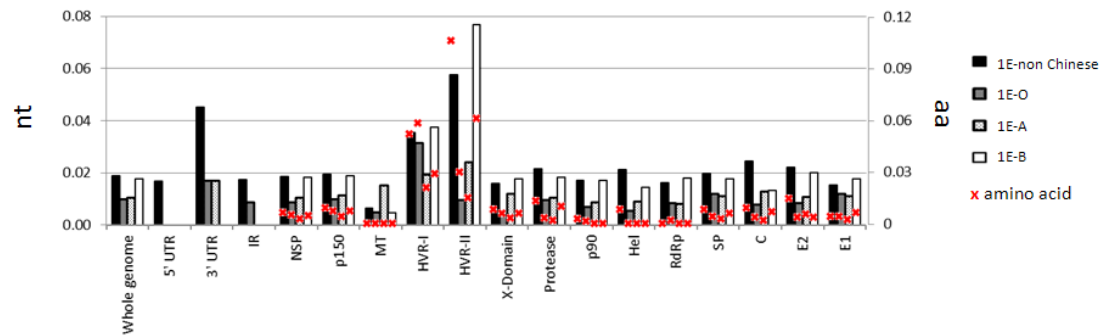

**B. Genetic relationship between non-Chinese 1E and Chinese 1E groups**

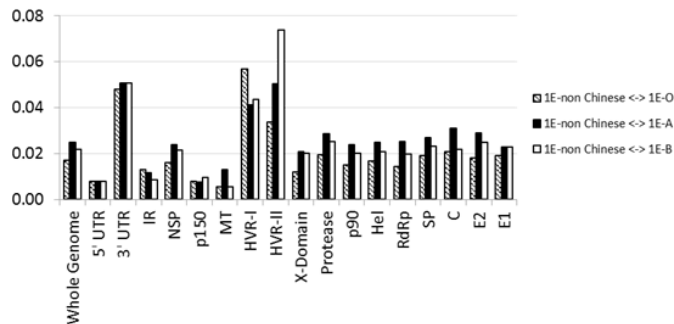

**C. Genetic relationship between Chinese 1E groups**

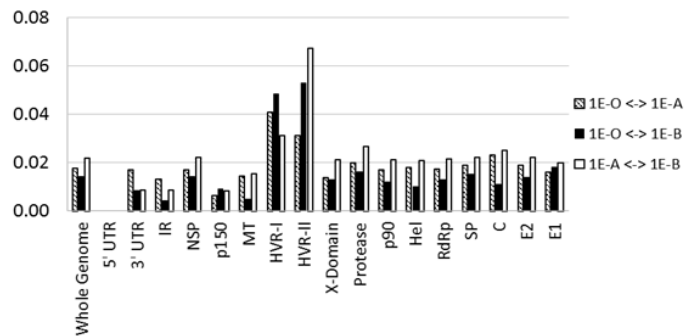

Supplemental Figure 4. The genetic variability within (A) and between (B and C) different clusters of genotype 2B rubella viruses. The methods for estimating genetic divergence within or between clusters pairwise and graphing are as described in Figure 2.

**A. Genetic variability within 2B clusters**

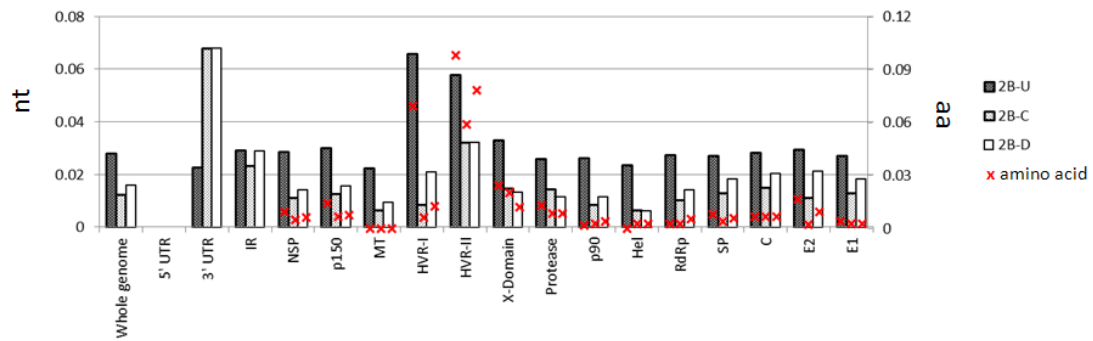

**B. Genetic relationship between strain I-11 and 2B clusters**

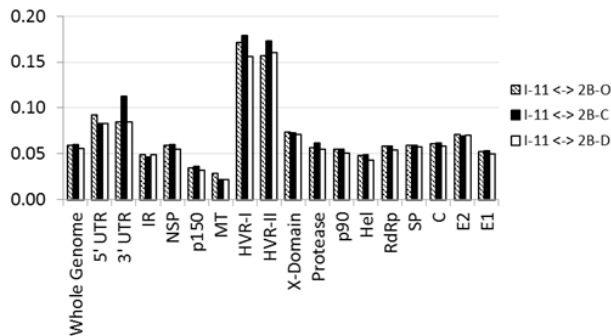

**C. Genetic relationship among 2B clusters**

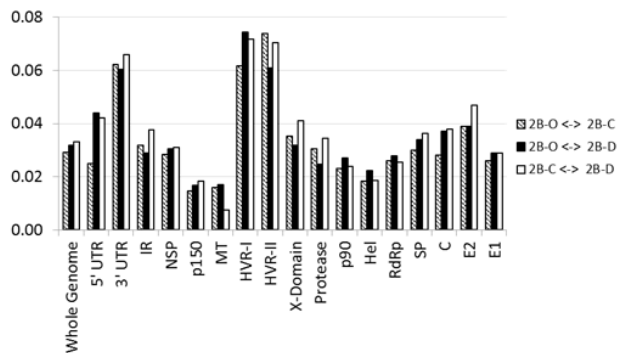

Supplement: srep39025-s1.pdf [file srep39025-s1.pdf]
